# Supplementary material
Source: PubMed Central journal article supplement (PMC3670666)
Supplement: NIHMS469502-supplement-ESI_-_Raw_cell_lysate_digest.pdf [file NIHMS469502-supplement-ESI_-_Raw_cell_lysate_digest.pdf]

rawcelllysatedigests\_2, 3 and 4: 0.7 ng sample loading amount  
singlecelllevel\_rawcelllysate\_2, 3 and 4: 0.1 ng sample loading amount

| PeptideSequence | ProteinName                     | ReplicateName                   | PrecursorMz            | PrecursorCharge | ProductMz  | ProductCharge | Fragmention | RetentionTime | Area | Background | PeakRank |   |
|-----------------|---------------------------------|---------------------------------|------------------------|-----------------|------------|---------------|-------------|---------------|------|------------|----------|---|
| AGFAGDDAPR      | Actin                           | rawcelllysatedigests_2          | 488.72778              | 2               | 701.321293 |               | 1 y7        |               | 4.37 | 1874       | 0        | 1 |
| AGFAGDDAPR      |                                 | rawcelllysatedigests_3          | 488.72778              | 2               | 701.321293 |               | 1 y7        |               | 4.35 | 2185       | 0        | 1 |
| AGFAGDDAPR      |                                 | rawcelllysatedigests_4          | 488.72778              | 2               | 701.321293 |               | 1 y7        | #N/A          | #N/A | #N/A       |          |   |
| AGFAGDDAPR      |                                 | singlecelllevel_rawcelllysate_2 | 488.72778              | 2               | 701.321293 |               | 1 y7        |               | 4.43 | 252        | 0        | 1 |
| AGFAGDDAPR      |                                 | singlecelllevel_rawcelllysate_3 | 488.72778              | 2               | 701.321293 |               | 1 y7        |               | 4.24 | 420        | 0        | 2 |
| AGFAGDDAPR      |                                 | singlecelllevel_rawcelllysate_4 | 488.72778              | 2               | 701.321293 |               | 1 y7        | #N/A          | #N/A | #N/A       |          |   |
| AGFAGDDAPR      |                                 | rawcelllysatedigests_2          | 488.72778              | 2               | 630.284179 |               | 1 y6        |               | 4.4  | 1093       | 0        | 2 |
| AGFAGDDAPR      |                                 | rawcelllysatedigests_3          | 488.72778              | 2               | 630.284179 |               | 1 y6        |               | 4.32 | 1249       | 0        | 2 |
| AGFAGDDAPR      |                                 | rawcelllysatedigests_4          | 488.72778              | 2               | 630.284179 |               | 1 y6        |               | 4.32 | 1249       | 0        | 1 |
| AGFAGDDAPR      |                                 | singlecelllevel_rawcelllysate_2 | 488.72778              | 2               | 630.284179 |               | 1 y6        |               | 4.45 | 168        | 0        | 2 |
| AGFAGDDAPR      |                                 | singlecelllevel_rawcelllysate_3 | 488.72778              | 2               | 630.284179 |               | 1 y6        |               | 4.24 | 464        | 0        | 1 |
| AGFAGDDAPR      |                                 | singlecelllevel_rawcelllysate_4 | 488.72778              | 2               | 630.284179 |               | 1 y6        |               | 4.16 | 378        | 0        | 1 |
| VNLAMDVGK       |                                 | Pyruvate kinase                 | rawcelllysatedigests_2 | 473.754952      | 2          | 620.307223    |             | 1 y6          |      | 3.93       | 1249     | 0 |
| VNLAMDVGK       | rawcelllysatedigests_3          |                                 | 473.754952             | 2               | 620.307223 |               | 1 y6        |               | 3.9  | 312        | 0        | 1 |
| VNLAMDVGK       | rawcelllysatedigests_4          |                                 | 473.754952             | 2               | 620.307223 |               | 1 y6        |               | 3.93 | 312        | 0        | 2 |
| VNLAMDVGK       | singlecelllevel_rawcelllysate_2 |                                 | 473.754952             | 2               | 620.307223 |               | 1 y6        |               | 3.93 | 168        | 0        | 1 |
| VNLAMDVGK       | singlecelllevel_rawcelllysate_3 |                                 | 473.754952             | 2               | 620.307223 |               | 1 y6        |               | 3.84 | 126        | 0        | 1 |
| VNLAMDVGK       | singlecelllevel_rawcelllysate_4 |                                 | 473.754952             | 2               | 620.307223 |               | 1 y6        |               | 3.82 | 42         | 0        | 2 |
| VNLAMDVGK       | rawcelllysatedigests_2          |                                 | 473.754952             | 2               | 549.270109 |               | 1 y5        |               | 3.9  | 156        | 0        | 2 |
| VNLAMDVGK       | rawcelllysatedigests_3          |                                 | 473.754952             | 2               | 549.270109 |               | 1 y5        | #N/A          | #N/A | #N/A       |          |   |
| VNLAMDVGK       | rawcelllysatedigests_4          |                                 | 473.754952             | 2               | 549.270109 |               | 1 y5        |               | 3.93 | 469        | 0        | 1 |
| VNLAMDVGK       | singlecelllevel_rawcelllysate_2 |                                 | 473.754952             | 2               | 549.270109 |               | 1 y5        |               | 3.93 | 126        | 0        | 2 |
| VNLAMDVGK       | singlecelllevel_rawcelllysate_3 |                                 | 473.754952             | 2               | 549.270109 |               | 1 y5        |               | 3.82 | 42         | 0        | 2 |
| VNLAMDVGK       | singlecelllevel_rawcelllysate_4 |                                 | 473.754952             | 2               | 549.270109 |               | 1 y5        |               | 3.84 | 126        | 0        | 1 |
| APIIAVTR        |                                 |                                 | rawcelllysatedigests_2 | 420.76872       | 2          | 672.440286    |             | 1 y6          |      | 3.51       | 1250     | 0 |
| APIIAVTR        |                                 | rawcelllysatedigests_3          | 420.76872              | 2               | 672.440286 |               | 1 y6        |               | 3.54 | 625        | 0        | 2 |
| APIIAVTR        |                                 | rawcelllysatedigests_4          | 420.76872              | 2               | 672.440286 |               | 1 y6        |               | 3.54 | 781        | 0        | 2 |
| APIIAVTR        |                                 | singlecelllevel_rawcelllysate_2 | 420.76872              | 2               | 672.440286 |               | 1 y6        | #N/A          | #N/A | #N/A       |          |   |
| APIIAVTR        |                                 | singlecelllevel_rawcelllysate_3 | 420.76872              | 2               | 672.440286 |               | 1 y6        |               | 3.51 | 335        | 0        | 2 |
| APIIAVTR        |                                 | singlecelllevel_rawcelllysate_4 | 420.76872              | 2               | 672.440286 |               | 1 y6        |               | 3.42 | 463        | 0        | 2 |
| APIIAVTR        |                                 | rawcelllysatedigests_2          | 420.76872              | 2               | 559.356222 |               | 1 y5        |               | 3.54 | 1093       | 0        | 2 |
| APIIAVTR        |                                 | rawcelllysatedigests_3          | 420.76872              | 2               | 559.356222 |               | 1 y5        |               | 3.54 | 2655       | 0        | 1 |
| APIIAVTR        |                                 | rawcelllysatedigests_4          | 420.76872              | 2               | 559.356222 |               | 1 y5        |               | 3.54 | 2187       | 0        | 1 |
| APIIAVTR        |                                 | singlecelllevel_rawcelllysate_2 | 420.76872              | 2               | 559.356222 |               | 1 y5        |               | 3.57 | 211        | 0        | 1 |
| APIIAVTR        |                                 | singlecelllevel_rawcelllysate_3 | 420.76872              | 2               | 559.356222 |               | 1 y5        |               | 3.49 | 1051       | 0        | 1 |
| APIIAVTR        |                                 | singlecelllevel_rawcelllysate_4 | 420.76872              | 2               | 559.356222 |               | 1 y5        |               | 3.45 | 715        | 0        | 1 |
| IGGIGTVPVGR     |                                 | Elongation factor               | rawcelllysatedigests_2 | 513.30874       | 2          | 912.526141    |             | 1 y10         | #N/A | #N/A       | #N/A     |   |
| IGGIGTVPVGR     | rawcelllysatedigests_3          |                                 | 513.30874              | 2               | 912.526141 |               | 1 y10       |               | 3.54 | 156        | 0        | 2 |
| IGGIGTVPVGR     | rawcelllysatedigests_4          |                                 | 513.30874              | 2               | 912.526141 |               | 1 y10       |               | 3.54 | 625        | 0        | 2 |
| IGGIGTVPVGR     | singlecelllevel_rawcelllysate_2 |                                 | 513.30874              | 2               | 912.526141 |               | 1 y10       |               | 3.55 | 126        | 0        | 2 |
| IGGIGTVPVGR     | singlecelllevel_rawcelllysate_3 |                                 | 513.30874              | 2               | 912.526141 |               | 1 y10       |               | 3.51 | 126        | 0        | 2 |
| IGGIGTVPVGR     | singlecelllevel_rawcelllysate_4 |                                 | 513.30874              | 2               | 912.526141 |               | 1 y10       |               | 3.47 | 252        | 0        | 2 |
| IGGIGTVPVGR     | rawcelllysatedigests_2          |                                 | 513.30874              | 2               | 685.399149 |               | 1 y7        |               | 3.54 | 2343       | 0        | 1 |
| IGGIGTVPVGR     | rawcelllysatedigests_3          |                                 | 513.30874              | 2               | 685.399149 |               | 1 y7        |               | 3.57 | 1874       | 0        | 1 |
| IGGIGTVPVGR     | rawcelllysatedigests_4          |                                 | 513.30874              | 2               | 685.399149 |               | 1 y7        |               | 3.54 | 2812       | 0        | 1 |
| IGGIGTVPVGR     | singlecelllevel_rawcelllysate_2 |                                 | 513.30874              | 2               | 685.399149 |               | 1 y7        |               | 3.57 | 1008       | 0        | 1 |
| IGGIGTVPVGR     | singlecelllevel_rawcelllysate_3 |                                 | 513.30874              | 2               | 685.399149 |               | 1 y7        |               | 3.51 | 420        | 0        | 1 |
| IGGIGTVPVGR     | singlecelllevel_rawcelllysate_4 |                                 | 513.30874              | 2               | 685.399149 |               | 1 y7        |               | 3.47 | 924        | 0        | 1 |
